# Supplementary material for: Diacenaphthylene-fused benzo[1,2-b:4,5-b′]dithiophenes: polycyclic heteroacenes containing full-carbon five-membered aromatic rings
Source: Royal Society of Chemistry journal article supplement (doi:10.1039/c6cc09184a), 2016-12-08
Supplement: c6cc09184a1.pdf [file c6cc09184a1.pdf]

## *Supporting Information for*

### **Diacenaphthylene-Fused Benzo[1,2-b:4,5-b']dithiophenes: Polycyclic Heteroacenes Containing Full-Carbon Five-Membered Aromatic Rings**

#### Experimental Section

##### *Synthesis of Compound M1*

**M1.** 1,8-Dibromonaphthalene (171.5 mg, 0.6 mmol), potassium carbonate (276 mg, 2 mmol), benzo[b]thiophene (67.1 mg, 0.5 mmol), Pd(OAc)<sub>2</sub> (5 mg, 0.02 mmol) and di-*t*-butylmethylphosphoniumtetrafluoroborate (10 mg, 0.04 mmol) were added in a 100mL three-necked flask. The flask was flushed with nitrogen 3 times. Then, degassed DMA (20 mL) was added. The mixture was heated to 100 °C for 20 h. After cooling to room temperature, the reaction was quenched with water. The organic product was extracted with dichloromethane (3×40 mL). The combined organic layers were washed with water (3×40 mL) and then dried over anhydrous MgSO<sub>4</sub>. After removing solvent under vacuum, the residue was purified by column chromatography on silica gel (hexane as eluent) to give **M1** as yellow solid. <sup>1</sup>H NMR (300 MHz, CDCl<sub>3</sub>) δ 8.16 (d, *J* = 8.6 Hz, 1H), 7.98 (d, *J* = 6.9 Hz, 1H), 7.89 (d, *J* = 8.1 Hz, 1H), 7.85 – 7.71 (m, 3H), 7.58 (dd, *J* = 14.2, 7.2 Hz, 2H), 7.47 (t, *J* = 7.5 Hz, 1H), 7.34 (t, *J* = 7.1 Hz, 1H). <sup>13</sup>C NMR (101 MHz, CDCl<sub>3</sub>) δ 144.55, 141.92, 138.99, 134.23, 134.10, 133.61, 133.44, 133.32, 129.06, 127.78, 127.71, 126.33, 125.13, 124.01, 121.97, 121.15. EI-MS: *m/z* 258 [M]<sup>+</sup>. HRMS (EI): calcd. for C<sub>18</sub>H<sub>10</sub>S [M]<sup>+</sup>: 258.0503; found: 258.0510. Anal. calcd. for C<sub>18</sub>H<sub>10</sub>S: C, 83.69; H, 3.90; Found: C, 83.45; H, 3.90.

##### *Syntheses of Compounds M2-M5*

Compounds **M2-M5** were synthesized by the same procedure as compound **M1**.

**M2.** Yield: 55.5%. <sup>1</sup>H NMR (400 MHz, CDCl<sub>3</sub>) δ 8.32 (d, *J* = 6.9 Hz, 1H), 7.86 – 7.72 (m, 3H), 7.59 (dt, *J* = 22.4, 7.4 Hz, 2H), 4.36 (t, *J* = 6.8 Hz, 2H), 2.17 – 1.99 (m,

2H), 1.71 – 1.59 (m, 2H), 1.50 – 1.21 (m, 8H), 0.91 (t,  $J = 6.8$  Hz, 3H).  $^{13}\text{C}$  NMR (101 MHz,  $\text{CDCl}_3$ )  $\delta$  145.13, 141.53, 137.40, 136.27, 134.10, 133.22, 128.96, 128.10, 127.78, 127.46, 126.37, 126.07, 123.98, 121.69, 74.76, 31.86, 30.61, 29.56, 29.43, 26.09, 22.69, 14.13. MS (MALDI-TOF)  $m/z$ : 694.3[M]<sup>+</sup>. HRMS (MALDI)  $m/z$ : calcd for  $\text{C}_{46}\text{H}_{46}\text{O}_2\text{S}_2$ [M]<sup>+</sup>: 694.2934; found: 694.2938. Anal. calcd. for  $\text{C}_{46}\text{H}_{46}\text{O}_2\text{S}_2$ : C, 79.50; H, 6.67; Found: C, 79.27; H, 6.71.

**M3.** Yield: 71.9 %.  $^1\text{H}$  NMR (400 MHz,  $\text{CDCl}_3$ )  $\delta$  8.34 (d,  $J = 6.6$  Hz, 2H), 7.83 (d,  $J = 7.1$  Hz, 4H), 7.77 (d,  $J = 8.2$  Hz, 2H), 7.60 (m,  $J = 13.8, 7.0$  Hz, 4H), 4.20 (d,  $J = 6.9$  Hz, 4H), 2.26 (m,  $J = 12.5, 6.3$  Hz, 2H), 1.92 – 1.56 (m, 8H), 1.41 (d,  $J = 6.5$  Hz, 8H), 1.05 (t,  $J = 7.4$  Hz, 6H), 0.93 (t,  $J = 6.5$  Hz, 6H).  $^{13}\text{C}$  NMR (101 MHz,  $\text{CDCl}_3$ )  $\delta$  145.46, 141.62, 137.32, 136.45, 134.04, 133.23, 128.97, 128.04, 127.80, 127.47, 126.42, 126.08, 124.08, 121.76, 78.46, 40.78, 30.29, 29.05, 23.78, 23.16, 14.11, 11.26. MS (MALDI-TOF)  $m/z$ : 694.3[M]<sup>+</sup>. HRMS (MALDI)  $m/z$ : calcd for  $\text{C}_{46}\text{H}_{46}\text{O}_2\text{S}_2$  [M]<sup>+</sup>: 694.2934, found: 694.2934. Anal. Calcd. for  $\text{C}_{46}\text{H}_{46}\text{O}_2\text{S}_2$ : C, 79.50; H, 6.67; Found: C, 79.70; H, 6.88.

**M4.** Yield: 25.8 %.  $^1\text{H}$  NMR (400 MHz,  $\text{CD}_2\text{Cl}_2\text{CD}_2\text{Cl}_2$ )  $\delta$  8.00 (d,  $J = 7.1$  Hz, 2H), 7.80 – 7.73 (m, 4H), 7.69 (d,  $J = 8.0$  Hz, 2H), 7.53 (dd,  $J = 15.1, 7.5$  Hz, 4H), 3.71 – 3.44 (m, 4H), 1.98 (s, 4H), 1.71 – 1.55 (m, 4H), 1.23 (d,  $J = 24.0$  Hz, 28H), 0.79 (d,  $J = 7.0$  Hz, 6H). Due to the poor solubility,  $^{13}\text{C}$  NMR cannot be acquired, MS (MALDI-TOF)  $m/z$ : 746.4[M]<sup>+</sup>. HRMS (MALDI)  $m/z$ : calcd for  $\text{C}_{52}\text{H}_{58}\text{S}_2$  [M]<sup>+</sup>: 746.3974, found: 746.3972. Anal. Calcd. for  $\text{C}_{52}\text{H}_{58}\text{S}_2$ : C, 83.59; H, 7.82; Found: C, 83.27; H, 7.79.

**M5.** Yield: 90%. MS (MALDI-TOF)  $m/z$ : 467.9 (M<sup>+</sup>). HRMS (MALDI)  $m/z$ : calcd for  $\text{C}_{30}\text{H}_{13}\text{O}_2\text{S}_2$  [M + H]<sup>+</sup>: 469.0351, found: 469.0344

### **Synthesis of Compound M6**

A dry 100 mL three-neck flask was flushed with nitrogen, 5-ethynyl-1,3-di(*t*-butyl)benzene (0.64 g, 3 mmol) in dry THF (25 mL) was added and cooled to  $-78$  °C. *n*-BuLi (3 mmol, 2.5 M in THF) was added slowly, the reaction solution was retained at  $-78$  °C for 1h. The reaction mixture was warmed to room temperature and stirred

for another 1h. Compounds **M5** (0.468 g, 1 mmol) was added quickly, and the mixture was stirred overnight. Stannous chloride Dihydrate (0.68 g, 3mmol) in 10% HCl (2 mL) was added. The reaction mixture was stirred for 2 h at 50 °C and was extracted with dichloromethane. The organic layer was washed with saturated brine solution, dried over anhydrous MgSO<sub>4</sub> and filtered. Dichloromethane was removed and the crude products were purified by column chromatography on silica gel (CH<sub>2</sub>Cl<sub>2</sub> / hexane = 1:2), affording **M6** as red solid (190 mg, 22.1%). <sup>1</sup>H NMR (400 MHz, C<sub>2</sub>D<sub>2</sub>Cl<sub>4</sub>) δ 9.02 (d, 2H), 7.86 (s, 2H), 7.81 (d, 2H), 7.72 (d, 2H), 7.67 (s,2H), 7.60 – 7.44 (m, 6H), 1.34 (s, 36H). Due to the poor solubility, <sup>13</sup>C NMR cannot be acquired. MS (MALDI-TOF) *m/z*: 862.4[M]<sup>+</sup>. HRMS (MALDI) *m/z*: calcd for C<sub>62</sub>H<sub>54</sub>S<sub>2</sub> [M]<sup>+</sup>: 862.3661, found: 862.3671.

### ***Spectroelectrochemical Studies***

The UV-vis spectroelectrochemical study was conducted at room temperature (293 K) in argon-saturated dichloromethane freshly distilled from CaH<sub>2</sub> and containing 10<sup>-1</sup> M Bu<sub>4</sub>NPF<sub>6</sub> (TBAH) recrystallized twice from absolute ethanol and dried overnight under vacuum at 353 K. The concentration of **M4** was close to saturation of the electrolyte used. The solution was filtered prior filling the spectroelectrochemical cell. For the 10<sup>-5</sup> M solution the absorbance changes upon oxidation were not perceptible.

The UV-vis absorption spectra were recorded with a Scinco S3100 diode array UV-vis spectrophotometer operating in the ‘fast’ mode. The potential control during the electrolyses within an OTTLE cell [1] was achieved with an EmStat3 potentiostat (PalmSense, the Netherlands). A thin-layer cyclic voltammogram was recorded at *v* = 2 mVs<sup>-1</sup> in the course of each spectroelectrochemical monitoring for comparative purposes. Each forward anodic or cathodic step was followed by the corresponding reverse reduction or reoxidation, respectively, to probe the chemical stability of the redox products, especially for the steps localized near the potential window limits of the organic electrolyte.

### ***Transistor fabrication and characterization***

The micro-sized transistor was a bottom-gate top-contact structure. n-Doped Si was used as the gate electrode and 300 nm SiO<sub>2</sub> was the dielectric layer. The OTS

modification was done according to the previously reported procedure.<sup>[2]</sup> The Au source and drain electrodes were fabricated through the “Au stripe mask”.<sup>[2]</sup> The channel width (W) and length (L) of the devices were measured through optical microscope and AFM images. The transistors were characterized in air by using a Keithley 4200-SCS semiconductor analyzer and the mobility was calculated from saturation region.

### **References**

- [1] M. Krejčík, M. Daněk and F. Hartl, *J. Electroanal. Chem. Interfacial Electrochem.* **1991**, 317, 179
- [2] M. Wang, J. Li, G. Zhao, Q. Wu, Y. Huang, W. Hu, X. Gao, H. Li, D. Zhu, *Adv. Mater.* **2013**, 25, 2229

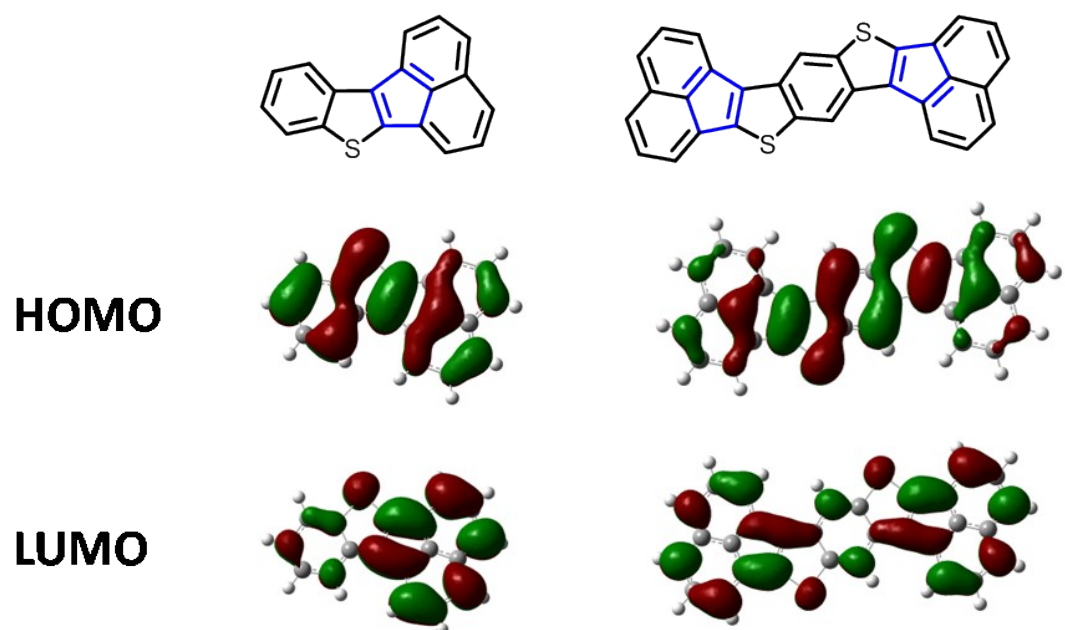

**Figure S1.** Frontier molecular orbitals of the unsubstituted CF-PAC models of **M1** (left) and **M2-M4** (right) calculated with Gaussian 09 package at B3LYP/6-31G(d,p) level of theory

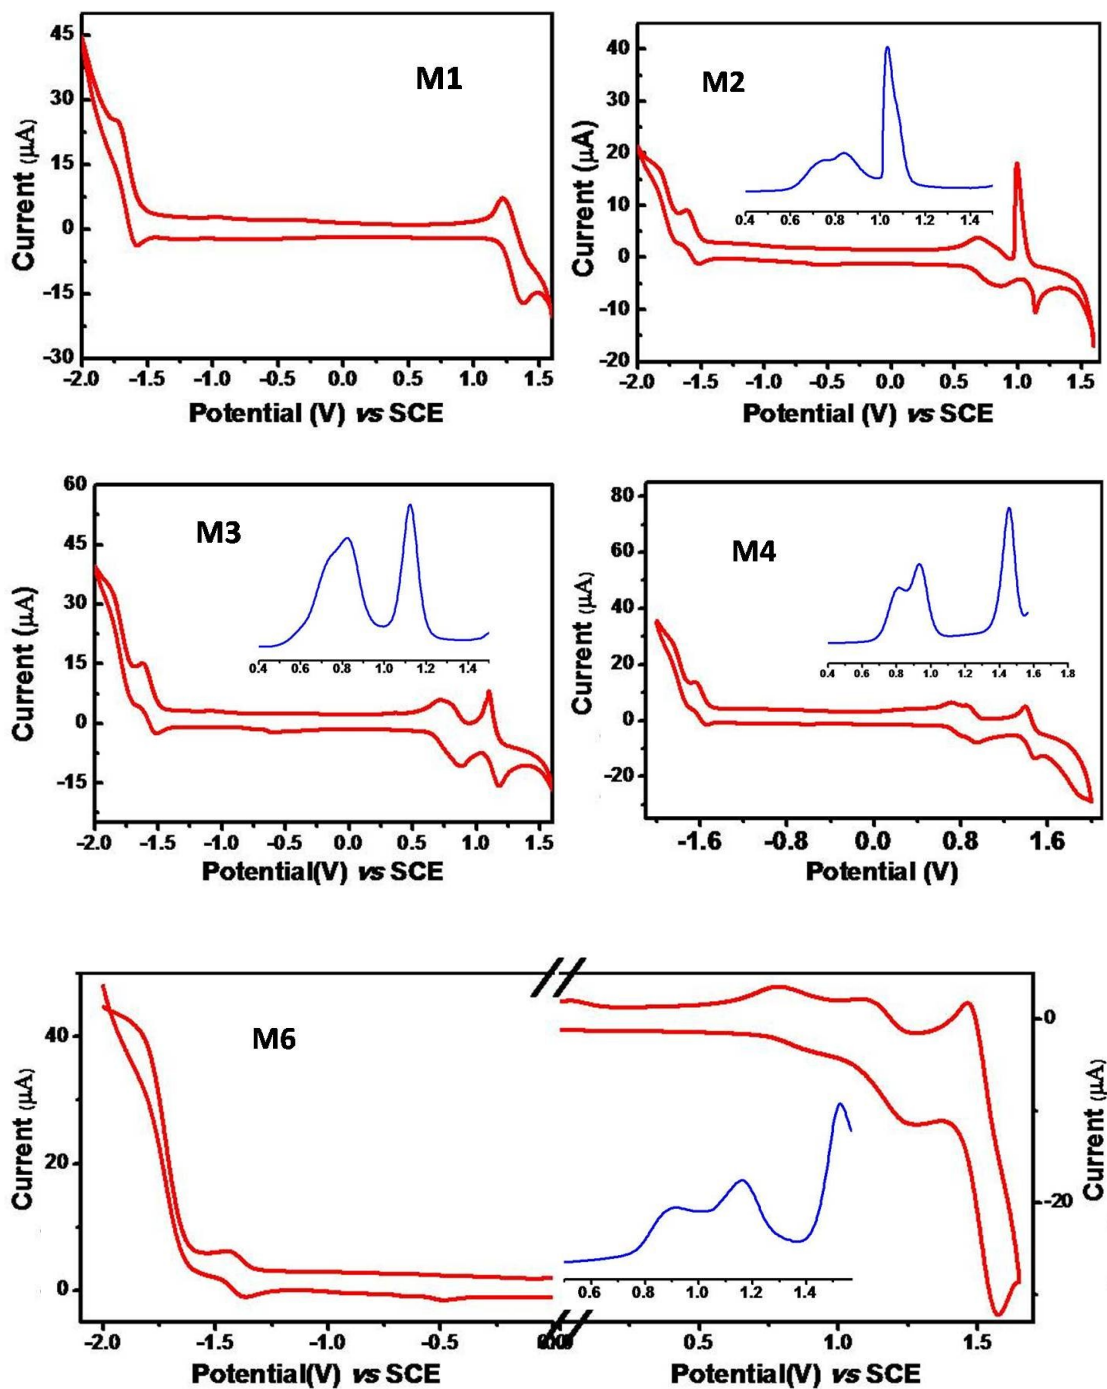

**Figure S2.** Cyclic voltammograms of compounds **M2-M4** and **M6** (red curves). Inset: corresponding differential pulse voltammograms in the anodic region (blue curves).

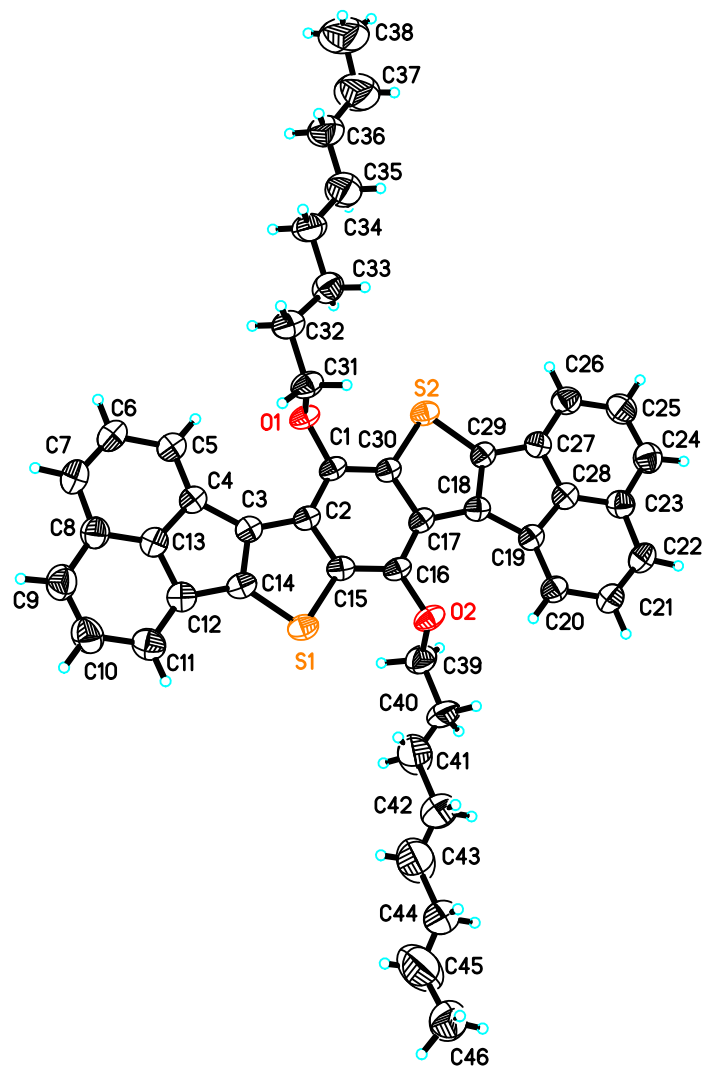

**Figure S3.** Molecular structure of compound **M2** showing thermal ellipsoids at the 50% probability level.

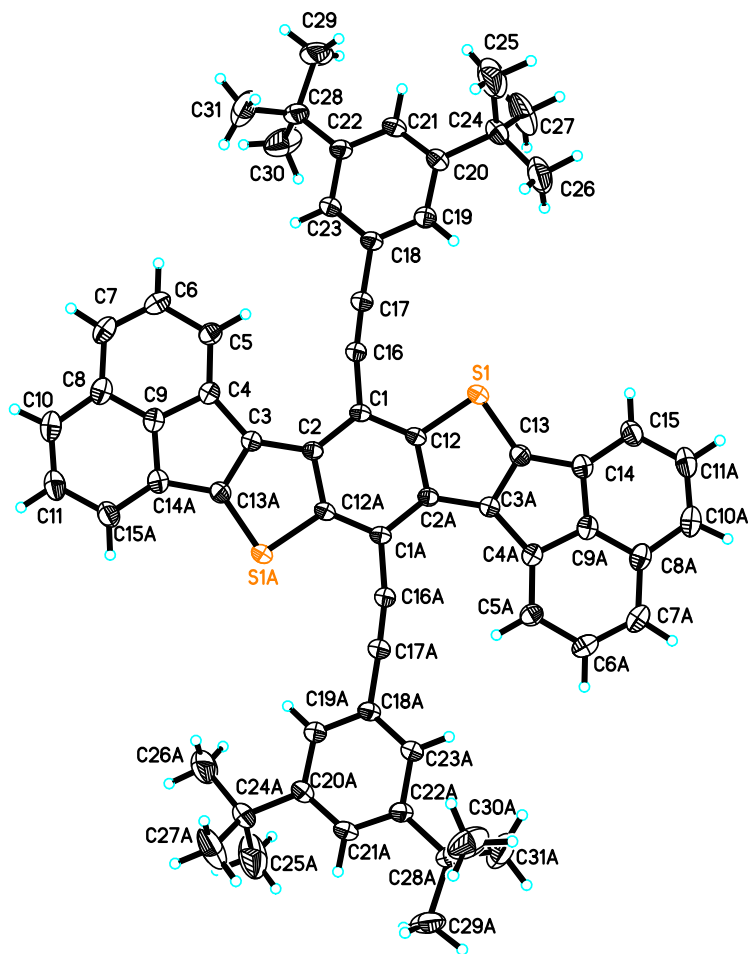

**Figure S4.** Molecular structure of compound **M6** showing thermal ellipsoids at the 50% probability level.

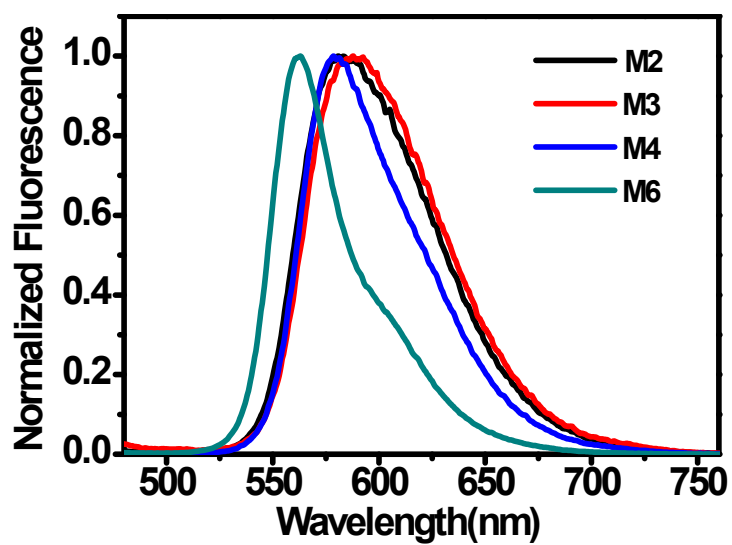

**Figure S5.** The fluorescence spectra of compounds **M2-M4** and **M6** in  $\text{CH}_2\text{Cl}_2$  solution ( $\lambda_{\text{exc}} = 405 \text{ nm}$ )



**Table S1.** Electrochemical Data and HOMO/LUMO Energy Levels for Compounds **M1-M4** and **M6**.

| Compd     | $E_{1/2}^{\text{ox1}}$ [a] | $E_{1/2}^{\text{ox2}}$ | $E_{1/2}^{\text{ox3}}$ | $E_{1/2}^{\text{red1}}$ | $E_{1/2}^{\text{red2}}$ | HOMO(eV) | LUMO(eV) |
|-----------|----------------------------|------------------------|------------------------|-------------------------|-------------------------|----------|----------|
|           | (V)                        | (V)                    | (V)                    | (V)                     | (V)                     |          |          |
| <b>M1</b> | 1.29                       |                        |                        | -1.65                   |                         | -5.65    | -2.71    |
| <b>M2</b> | 0.67                       | 0.78                   | 1.07                   | -1.58                   | -1.77                   | -5.14    | -2.78    |
| <b>M3</b> | 0.68                       | 0.80                   | 1.09                   | -1.57                   | -1.78                   | -5.16    | -2.79    |
| <b>M4</b> | 0.70                       | 0.80                   | 1.30                   | -1.59                   | -1.81                   | -5.16    | -2.77    |
| <b>M6</b> | 0.80                       | 1.12                   | 1.50                   | -1.41                   | -1.74                   | -5.38    | -2.95    |

<sup>a</sup> The electrode potentials are given in Volt vs SCE. The concentration of the parent compounds in dichloromethane/*n*-Bu<sub>4</sub>NPF<sub>6</sub> was 10<sup>-3</sup> M.

**Table S2.** Crystal data and structure refinement for **M2**.

---

|                                   |                                                                                                                              |
|-----------------------------------|------------------------------------------------------------------------------------------------------------------------------|
| Identification code               | <b>M2</b>                                                                                                                    |
| Empirical formula                 | C <sub>46</sub> H <sub>46</sub> O <sub>2</sub> S <sub>2</sub>                                                                |
| Formula weight                    | 694.95                                                                                                                       |
| Temperature                       | 296(2) K                                                                                                                     |
| Wavelength                        | 0.71073 Å                                                                                                                    |
| Crystal system, space group       | Triclinic, P-1                                                                                                               |
| Unit cell dimensions              | a = 13.0940(7) Å    alpha = 76.383(2)°<br>b = 14.5388(8) Å    beta = 82.5890(10)°<br>c = 20.6868(12) Å    gamma = 80.352(2)° |
| Volume                            | 3756.8(4) Å <sup>3</sup>                                                                                                     |
| Z, Calculated density             | 4, 1.229 Mg/m <sup>3</sup>                                                                                                   |
| Absorption coefficient            | 0.180 mm <sup>-1</sup>                                                                                                       |
| F(000)                            | 1480                                                                                                                         |
| Crystal size                      | 0.22 × 0.20 × 0.15 mm                                                                                                        |
| Theta range for data collection   | 1.46 to 25.01 °                                                                                                              |
| Limiting indices                  | -15 ≤ h ≤ 15, -17 ≤ k ≤ 17, -24 ≤ l ≤ 21                                                                                     |
| Reflections collected / unique    | 26100 / 13010 [R(int) = 0.0520]                                                                                              |
| Completeness to theta = 25.01     | 98.1 %                                                                                                                       |
| Absorption correction             | Semi-empirical from equivalents                                                                                              |
| Max. and min. transmission        | 0.9736 and 0.9616                                                                                                            |
| Refinement method                 | Full-matrix least-squares on F <sup>2</sup>                                                                                  |
| Data / restraints / parameters    | 13010 / 68 / 901                                                                                                             |
| Goodness-of-fit on F <sup>2</sup> | 0.998                                                                                                                        |
| Final R indices [I > 2σ(I)]       | R <sub>1</sub> = 0.0713, wR <sub>2</sub> = 0.1635                                                                            |
| R indices (all data)              | R <sub>1</sub> = 0.1660, wR <sub>2</sub> = 0.2127                                                                            |
| Largest diff. peak and hole       | 0.416 and -0.412 eÅ <sup>-3</sup>                                                                                            |

---

**Table S3.** Atomic coordinates ( $\times 10^4$ ) and equivalent isotropic displacement parameters ( $\text{Å}^2 \times 10^3$ ) for **M2**.  $U(\text{eq})$  is defined as one third of the trace of the orthogonalized  $U_{ij}$  tensor.

|       | x        | y        | z        | $U(\text{eq})$ |
|-------|----------|----------|----------|----------------|
| S(1)  | 5067(1)  | 2245(1)  | 970(1)   | 69(1)          |
| S(2)  | 6131(1)  | -1933(1) | 580(1)   | 65(1)          |
| S(3)  | -60(1)   | 2559(1)  | 5717(1)  | 59(1)          |
| S(4)  | 1147(1)  | -82(1)   | 3694(1)  | 56(1)          |
| O(1)  | 7333(2)  | -288(2)  | -91(1)   | 61(1)          |
| O(2)  | 3932(2)  | 544(2)   | 1711(2)  | 71(1)          |
| O(3)  | 2328(2)  | -102(2)  | 4863(1)  | 52(1)          |
| O(4)  | -1185(2) | 2666(2)  | 4486(1)  | 55(1)          |
| C(1)  | 6456(3)  | -36(3)   | 320(2)   | 55(1)          |
| C(2)  | 6164(3)  | 895(3)   | 410(2)   | 52(1)          |
| C(3)  | 6608(3)  | 1757(3)  | 118(2)   | 56(1)          |
| C(4)  | 7441(3)  | 2103(3)  | -382(2)  | 60(1)          |
| C(5)  | 8179(4)  | 1744(3)  | -816(2)  | 70(1)          |
| C(6)  | 8853(4)  | 2347(4)  | -1232(3) | 86(2)          |
| C(7)  | 8774(4)  | 3297(4)  | -1221(3) | 91(2)          |
| C(8)  | 8003(4)  | 3694(4)  | -793(3)  | 81(2)          |
| C(9)  | 7788(5)  | 4668(4)  | -734(3)  | 102(2)         |
| C(10) | 7000(5)  | 4957(4)  | -301(3)  | 103(2)         |
| C(11) | 6346(4)  | 4328(4)  | 117(3)   | 89(2)          |
| C(12) | 6536(4)  | 3386(4)  | 72(2)    | 70(1)          |
| C(13) | 7369(4)  | 3086(4)  | -381(3)  | 68(1)          |
| C(14) | 6090(3)  | 2516(3)  | 376(2)   | 65(1)          |
| C(15) | 5293(3)  | 1063(3)  | 878(2)   | 56(1)          |
| C(16) | 4722(3)  | 352(3)   | 1224(2)  | 55(1)          |
| C(17) | 4990(3)  | -564(3)  | 1116(2)  | 56(1)          |
| C(18) | 4558(3)  | -1432(3) | 1403(2)  | 56(1)          |
| C(19) | 3710(3)  | -1790(3) | 1900(2)  | 59(1)          |
| C(20) | 2958(3)  | -1434(3) | 2339(2)  | 68(1)          |
| C(21) | 2310(4)  | -2053(4) | 2760(3)  | 78(2)          |
| C(22) | 2398(4)  | -2997(4) | 2749(3)  | 81(2)          |
| C(23) | 3167(4)  | -3401(4) | 2311(3)  | 77(1)          |
| C(24) | 3396(4)  | -4367(4) | 2253(3)  | 92(2)          |
| C(25) | 4201(5)  | -4643(4) | 1816(3)  | 93(2)          |
| C(26) | 4838(4)  | -4002(4) | 1403(3)  | 81(2)          |
| C(27) | 4627(4)  | -3056(3) | 1443(2)  | 65(1)          |
| C(28) | 3796(3)  | -2772(3) | 1896(2)  | 65(1)          |
| C(29) | 5076(3)  | -2189(3) | 1153(2)  | 59(1)          |

|       |          |          |          |        |
|-------|----------|----------|----------|--------|
| C(30) | 5871(3)  | -743(3)  | 652(2)   | 52(1)  |
| C(31) | 8264(3)  | -531(4)  | 252(2)   | 78(1)  |
| C(32) | 9131(4)  | -1001(4) | -145(3)  | 85(2)  |
| C(33) | 9063(4)  | -1998(4) | -182(3)  | 94(2)  |
| C(34) | 9959(4)  | -2474(4) | -567(3)  | 105(2) |
| C(35) | 9979(5)  | -3437(5) | -635(4)  | 132(2) |
| C(36) | 10869(5) | -3903(5) | -999(4)  | 134(3) |
| C(37) | 10972(7) | -4856(6) | -1075(5) | 189(4) |
| C(38) | 11843(7) | -5343(6) | -1369(5) | 215(5) |
| C(39) | 2986(4)  | 1021(4)  | 1469(3)  | 95(2)  |
| C(40) | 2296(6)  | 1386(5)  | 1983(4)  | 172(4) |
| C(41) | 2324(8)  | 2298(5)  | 2083(4)  | 184(4) |
| C(42) | 1663(8)  | 2653(6)  | 2630(4)  | 195(4) |
| C(43) | 1229(8)  | 3569(6)  | 2635(4)  | 181(4) |
| C(44) | 658(6)   | 3884(5)  | 3228(4)  | 159(3) |
| C(45) | 235(10)  | 4773(6)  | 3290(6)  | 235(5) |
| C(46) | -252(7)  | 5013(5)  | 3880(4)  | 173(4) |
| C(47) | 1433(3)  | 553(3)   | 4808(2)  | 47(1)  |
| C(48) | 1102(3)  | 1137(3)  | 5262(2)  | 44(1)  |
| C(49) | 1507(3)  | 1191(3)  | 5860(2)  | 48(1)  |
| C(50) | 2336(3)  | 681(3)   | 6283(2)  | 51(1)  |
| C(51) | 3075(3)  | -99(3)   | 6305(2)  | 59(1)  |
| C(52) | 3747(3)  | -353(3)  | 6830(3)  | 73(1)  |
| C(53) | 3669(4)  | 151(4)   | 7320(3)  | 74(1)  |
| C(54) | 2894(4)  | 949(3)   | 7324(2)  | 64(1)  |
| C(55) | 2671(4)  | 1523(4)  | 7803(2)  | 79(2)  |
| C(56) | 1847(4)  | 2252(4)  | 7753(2)  | 78(2)  |
| C(57) | 1198(4)  | 2470(3)  | 7231(2)  | 70(1)  |
| C(58) | 1407(3)  | 1939(3)  | 6750(2)  | 56(1)  |
| C(59) | 2247(3)  | 1182(3)  | 6808(2)  | 55(1)  |
| C(60) | 963(3)   | 1906(3)  | 6145(2)  | 52(1)  |
| C(61) | 217(3)   | 1840(3)  | 5130(2)  | 50(1)  |
| C(62) | -356(3)  | 1945(3)  | 4591(2)  | 49(1)  |
| C(63) | -44(3)   | 1334(3)  | 4151(2)  | 47(1)  |
| C(64) | -450(3)  | 1258(3)  | 3555(2)  | 51(1)  |
| C(65) | -1284(3) | 1751(3)  | 3130(2)  | 55(1)  |
| C(66) | -2044(3) | 2524(3)  | 3097(2)  | 68(1)  |
| C(67) | -2716(4) | 2754(3)  | 2578(3)  | 81(2)  |
| C(68) | -2608(4) | 2242(4)  | 2098(3)  | 78(2)  |
| C(69) | -1820(4) | 1454(4)  | 2092(2)  | 68(1)  |
| C(70) | -1602(4) | 843(4)   | 1637(3)  | 80(2)  |
| C(71) | -795(4)  | 111(4)   | 1700(2)  | 75(1)  |
| C(72) | -147(3)  | -85(3)   | 2219(2)  | 65(1)  |
| C(73) | -334(3)  | 478(3)   | 2684(2)  | 55(1)  |

|       |           |          |          |         |
|-------|-----------|----------|----------|---------|
| C(74) | -1168(3)  | 1238(3)  | 2610(2)  | 57(1)   |
| C(75) | 102(3)    | 536(3)   | 3280(2)  | 56(1)   |
| C(76) | 854(3)    | 631(3)   | 4287(2)  | 47(1)   |
| C(77) | 3244(3)   | 331(3)   | 4556(2)  | 65(1)   |
| C(78) | 4140(3)   | -440(3)  | 4513(2)  | 69(1)   |
| C(79) | 4107(3)   | -1011(3) | 3990(2)  | 70(1)   |
| C(80) | 5002(3)   | -1822(3) | 4002(2)  | 70(1)   |
| C(81) | 5027(3)   | -2405(3) | 3485(3)  | 78(1)   |
| C(82) | 5883(4)   | -3244(3) | 3525(3)  | 88(2)   |
| C(83) | 5917(5)   | -3829(4) | 3006(3)  | 112(2)  |
| C(84) | 6702(7)   | -4674(4) | 3071(4)  | 174(4)  |
| C(85) | -2139(3)  | 2408(3)  | 4855(3)  | 77(1)   |
| C(86) | -2891(4)  | 3291(4)  | 4850(3)  | 94(2)   |
| C(87) | -2594(5)  | 3962(4)  | 5226(3)  | 112(2)  |
| C(88) | -3374(6)  | 4808(5)  | 5280(4)  | 167(3)  |
| C(89) | -3045(8)  | 5472(6)  | 5631(5)  | 221(5)  |
| C(90) | -4123(9)  | 6251(9)  | 5895(8)  | 257(7)  |
| C(91) | -3599(14) | 6842(10) | 5896(13) | 393(15) |
| C(92) | -4639(9)  | 7453(7)  | 6272(6)  | 234(5)  |

---

**Table S4.** Bond lengths [ $\text{\AA}$ ] and angles [deg] for **M2**.

|              |          |              |          |
|--------------|----------|--------------|----------|
| S(1)-C(14)   | 1.727(5) | C(17)-C(30)  | 1.432(5) |
| S(1)-C(15)   | 1.745(4) | C(17)-C(18)  | 1.437(5) |
| S(2)-C(29)   | 1.730(4) | C(18)-C(29)  | 1.366(5) |
| S(2)-C(30)   | 1.744(4) | C(18)-C(19)  | 1.486(6) |
| S(3)-C(60)   | 1.721(4) | C(19)-C(20)  | 1.372(5) |
| S(3)-C(61)   | 1.748(4) | C(19)-C(28)  | 1.415(6) |
| S(4)-C(75)   | 1.715(4) | C(20)-C(21)  | 1.410(6) |
| S(4)-C(76)   | 1.753(4) | C(20)-H(20A) | 0.9300   |
| O(1)-C(1)    | 1.389(4) | C(21)-C(22)  | 1.362(6) |
| O(1)-C(31)   | 1.441(5) | C(21)-H(21A) | 0.9300   |
| O(2)-C(16)   | 1.389(4) | C(22)-C(23)  | 1.413(6) |
| O(2)-C(39)   | 1.405(5) | C(22)-H(22A) | 0.9300   |
| O(3)-C(47)   | 1.379(4) | C(23)-C(28)  | 1.398(6) |
| O(3)-C(77)   | 1.450(4) | C(23)-C(24)  | 1.416(6) |
| O(4)-C(62)   | 1.376(4) | C(24)-C(25)  | 1.368(7) |
| O(4)-C(85)   | 1.436(5) | C(24)-H(24A) | 0.9300   |
| C(1)-C(30)   | 1.382(5) | C(25)-C(26)  | 1.414(7) |
| C(1)-C(2)    | 1.393(5) | C(25)-H(25A) | 0.9300   |
| C(2)-C(15)   | 1.427(5) | C(26)-C(27)  | 1.377(6) |
| C(2)-C(3)    | 1.439(6) | C(26)-H(26A) | 0.9300   |
| C(3)-C(14)   | 1.377(5) | C(27)-C(28)  | 1.414(6) |
| C(3)-C(4)    | 1.470(6) | C(27)-C(29)  | 1.448(6) |
| C(4)-C(5)    | 1.357(5) | C(31)-C(32)  | 1.482(6) |
| C(4)-C(13)   | 1.417(6) | C(31)-H(31A) | 0.9700   |
| C(5)-C(6)    | 1.413(6) | C(31)-H(31B) | 0.9700   |
| C(5)-H(5A)   | 0.9300   | C(32)-C(33)  | 1.487(6) |
| C(6)-C(7)    | 1.373(6) | C(32)-H(32A) | 0.9700   |
| C(6)-H(6A)   | 0.9300   | C(32)-H(32B) | 0.9700   |
| C(7)-C(8)    | 1.397(7) | C(33)-C(34)  | 1.494(6) |
| C(7)-H(7A)   | 0.9300   | C(33)-H(33A) | 0.9700   |
| C(8)-C(13)   | 1.380(6) | C(33)-H(33B) | 0.9700   |
| C(8)-C(9)    | 1.427(7) | C(34)-C(35)  | 1.436(7) |
| C(9)-C(10)   | 1.355(7) | C(34)-H(34A) | 0.9700   |
| C(9)-H(9A)   | 0.9300   | C(34)-H(34B) | 0.9700   |
| C(10)-C(11)  | 1.420(7) | C(35)-C(36)  | 1.460(7) |
| C(10)-H(10A) | 0.9300   | C(35)-H(35A) | 0.9700   |
| C(11)-C(12)  | 1.373(6) | C(35)-H(35B) | 0.9700   |
| C(11)-H(11A) | 0.9300   | C(36)-C(37)  | 1.413(8) |
| C(12)-C(13)  | 1.424(6) | C(36)-H(36A) | 0.9700   |
| C(12)-C(14)  | 1.454(6) | C(36)-H(36B) | 0.9700   |
| C(15)-C(16)  | 1.383(5) | C(37)-C(38)  | 1.387(9) |
| C(16)-C(17)  | 1.381(5) | C(37)-H(37A) | 0.9700   |

|              |           |              |          |
|--------------|-----------|--------------|----------|
| C(37)-H(37B) | 0.9700    | C(55)-C(56)  | 1.375(6) |
| C(38)-H(38A) | 0.9600    | C(55)-H(55A) | 0.9300   |
| C(38)-H(38B) | 0.9600    | C(56)-C(57)  | 1.406(6) |
| C(38)-H(38C) | 0.9600    | C(56)-H(56A) | 0.9300   |
| C(39)-C(40)  | 1.445(7)  | C(57)-C(58)  | 1.373(5) |
| C(39)-H(39A) | 0.9700    | C(57)-H(57A) | 0.9300   |
| C(39)-H(39B) | 0.9700    | C(58)-C(59)  | 1.414(5) |
| C(40)-C(41)  | 1.395(6)  | C(58)-C(60)  | 1.460(5) |
| C(40)-H(40A) | 0.9700    | C(61)-C(62)  | 1.388(5) |
| C(40)-H(40B) | 0.9700    | C(62)-C(63)  | 1.395(5) |
| C(41)-C(42)  | 1.472(8)  | C(63)-C(76)  | 1.433(5) |
| C(41)-H(41A) | 0.9700    | C(63)-C(64)  | 1.438(5) |
| C(41)-H(41B) | 0.9700    | C(64)-C(75)  | 1.367(5) |
| C(42)-C(43)  | 1.359(7)  | C(64)-C(65)  | 1.472(5) |
| C(42)-H(42A) | 0.9700    | C(65)-C(66)  | 1.366(5) |
| C(42)-H(42B) | 0.9700    | C(65)-C(74)  | 1.425(5) |
| C(43)-C(44)  | 1.479(9)  | C(66)-C(67)  | 1.420(6) |
| C(43)-H(43A) | 0.9700    | C(66)-H(66A) | 0.9300   |
| C(43)-H(43B) | 0.9700    | C(67)-C(68)  | 1.355(6) |
| C(44)-C(45)  | 1.347(7)  | C(67)-H(67A) | 0.9300   |
| C(44)-H(44A) | 0.9700    | C(68)-C(69)  | 1.408(6) |
| C(44)-H(44B) | 0.9700    | C(68)-H(68A) | 0.9300   |
| C(45)-C(46)  | 1.395(10) | C(69)-C(74)  | 1.401(6) |
| C(45)-H(45A) | 0.9700    | C(69)-C(70)  | 1.413(6) |
| C(45)-H(45B) | 0.9700    | C(70)-C(71)  | 1.363(6) |
| C(46)-H(46A) | 0.9600    | C(70)-H(70A) | 0.9300   |
| C(46)-H(46B) | 0.9600    | C(71)-C(72)  | 1.401(6) |
| C(46)-H(46C) | 0.9600    | C(71)-H(71A) | 0.9300   |
| C(47)-C(76)  | 1.370(5)  | C(72)-C(73)  | 1.378(5) |
| C(47)-C(48)  | 1.391(5)  | C(72)-H(72A) | 0.9300   |
| C(48)-C(61)  | 1.419(5)  | C(73)-C(74)  | 1.413(5) |
| C(48)-C(49)  | 1.432(5)  | C(73)-C(75)  | 1.450(5) |
| C(49)-C(60)  | 1.366(5)  | C(77)-C(78)  | 1.490(5) |
| C(49)-C(50)  | 1.470(5)  | C(77)-H(77A) | 0.9700   |
| C(50)-C(51)  | 1.358(5)  | C(77)-H(77B) | 0.9700   |
| C(50)-C(59)  | 1.427(5)  | C(78)-C(79)  | 1.520(5) |
| C(51)-C(52)  | 1.426(6)  | C(78)-H(78A) | 0.9700   |
| C(51)-H(51A) | 0.9300    | C(78)-H(78B) | 0.9700   |
| C(52)-C(53)  | 1.368(6)  | C(79)-C(80)  | 1.515(5) |
| C(52)-H(52A) | 0.9300    | C(79)-H(79A) | 0.9700   |
| C(53)-C(54)  | 1.409(6)  | C(79)-H(79B) | 0.9700   |
| C(53)-H(53A) | 0.9300    | C(80)-C(81)  | 1.508(6) |
| C(54)-C(59)  | 1.392(6)  | C(80)-H(80A) | 0.9700   |
| C(54)-C(55)  | 1.415(6)  | C(80)-H(80B) | 0.9700   |

|                  |           |                    |          |
|------------------|-----------|--------------------|----------|
| C(81)-C(82)      | 1.506(6)  | C(30)-C(1)-O(1)    | 118.2(4) |
| C(81)-H(81A)     | 0.9700    | C(30)-C(1)-C(2)    | 119.8(4) |
| C(81)-H(81B)     | 0.9700    | O(1)-C(1)-C(2)     | 122.0(4) |
| C(82)-C(83)      | 1.512(6)  | C(1)-C(2)-C(15)    | 117.5(4) |
| C(82)-H(82A)     | 0.9700    | C(1)-C(2)-C(3)     | 131.3(4) |
| C(82)-H(82B)     | 0.9700    | C(15)-C(2)-C(3)    | 111.2(4) |
| C(83)-C(84)      | 1.456(7)  | C(14)-C(3)-C(2)    | 111.5(4) |
| C(83)-H(83A)     | 0.9700    | C(14)-C(3)-C(4)    | 108.2(4) |
| C(83)-H(83B)     | 0.9700    | C(2)-C(3)-C(4)     | 140.3(4) |
| C(84)-H(84A)     | 0.9600    | C(5)-C(4)-C(13)    | 117.6(4) |
| C(84)-H(84B)     | 0.9600    | C(5)-C(4)-C(3)     | 137.5(4) |
| C(84)-H(84C)     | 0.9600    | C(13)-C(4)-C(3)    | 104.8(4) |
| C(85)-C(86)      | 1.480(6)  | C(4)-C(5)-C(6)     | 119.4(5) |
| C(85)-H(85A)     | 0.9700    | C(4)-C(5)-H(5A)    | 120.3    |
| C(85)-H(85B)     | 0.9700    | C(6)-C(5)-H(5A)    | 120.3    |
| C(86)-C(87)      | 1.507(7)  | C(7)-C(6)-C(5)     | 122.0(5) |
| C(86)-H(86A)     | 0.9700    | C(7)-C(6)-H(6A)    | 119.0    |
| C(86)-H(86B)     | 0.9700    | C(5)-C(6)-H(6A)    | 119.0    |
| C(87)-C(88)      | 1.478(7)  | C(6)-C(7)-C(8)     | 119.8(5) |
| C(87)-H(87A)     | 0.9700    | C(6)-C(7)-H(7A)    | 120.1    |
| C(87)-H(87B)     | 0.9700    | C(8)-C(7)-H(7A)    | 120.1    |
| C(88)-C(89)      | 1.483(10) | C(13)-C(8)-C(7)    | 117.0(5) |
| C(88)-H(88A)     | 0.9700    | C(13)-C(8)-C(9)    | 115.7(5) |
| C(88)-H(88B)     | 0.9700    | C(7)-C(8)-C(9)     | 127.2(6) |
| C(89)-C(90)      | 1.770(14) | C(10)-C(9)-C(8)    | 120.8(6) |
| C(89)-H(89A)     | 0.9700    | C(10)-C(9)-H(9A)   | 119.6    |
| C(89)-H(89B)     | 0.9700    | C(8)-C(9)-H(9A)    | 119.6    |
| C(90)-C(91)      | 1.187(12) | C(9)-C(10)-C(11)   | 123.1(6) |
| C(90)-H(90A)     | 0.9700    | C(9)-C(10)-H(10A)  | 118.4    |
| C(90)-H(90B)     | 0.9700    | C(11)-C(10)-H(10A) | 118.4    |
| C(91)-C(92)      | 1.70(2)   | C(12)-C(11)-C(10)  | 117.4(5) |
| C(91)-H(91A)     | 0.9700    | C(12)-C(11)-H(11A) | 121.3    |
| C(91)-H(91B)     | 0.9700    | C(10)-C(11)-H(11A) | 121.3    |
| C(92)-H(92A)     | 0.9600    | C(11)-C(12)-C(13)  | 119.2(5) |
| C(92)-H(92B)     | 0.9600    | C(11)-C(12)-C(14)  | 137.1(5) |
| C(92)-H(92C)     | 0.9600    | C(13)-C(12)-C(14)  | 103.7(4) |
| C(14)-S(1)-C(15) | 90.3(2)   | C(8)-C(13)-C(4)    | 124.0(5) |
| C(29)-S(2)-C(30) | 89.7(2)   | C(8)-C(13)-C(12)   | 123.8(5) |
| C(60)-S(3)-C(61) | 90.09(19) | C(4)-C(13)-C(12)   | 112.2(4) |
| C(75)-S(4)-C(76) | 90.2(2)   | C(3)-C(14)-C(12)   | 111.1(4) |
| C(1)-O(1)-C(31)  | 112.4(3)  | C(3)-C(14)-S(1)    | 114.8(4) |
| C(16)-O(2)-C(39) | 115.2(4)  | C(12)-C(14)-S(1)   | 134.2(4) |
| C(47)-O(3)-C(77) | 111.9(3)  | C(16)-C(15)-C(2)   | 122.7(4) |
| C(62)-O(4)-C(85) | 113.3(3)  | C(16)-C(15)-S(1)   | 125.1(3) |



|                    |          |                     |          |
|--------------------|----------|---------------------|----------|
| C(2)-C(15)-S(1)    | 112.2(3) | C(1)-C(30)-S(2)     | 124.9(3) |
| C(17)-C(16)-C(15)  | 119.7(4) | C(17)-C(30)-S(2)    | 112.9(3) |
| C(17)-C(16)-O(2)   | 120.2(4) | O(1)-C(31)-C(32)    | 111.0(4) |
| C(15)-C(16)-O(2)   | 119.9(4) | O(1)-C(31)-H(31A)   | 109.4    |
| C(16)-C(17)-C(30)  | 118.0(4) | C(32)-C(31)-H(31A)  | 109.4    |
| C(16)-C(17)-C(18)  | 131.9(4) | O(1)-C(31)-H(31B)   | 109.4    |
| C(30)-C(17)-C(18)  | 110.1(4) | C(32)-C(31)-H(31B)  | 109.4    |
| C(29)-C(18)-C(17)  | 112.4(4) | H(31A)-C(31)-H(31B) | 108.0    |
| C(29)-C(18)-C(19)  | 107.4(4) | C(31)-C(32)-C(33)   | 116.4(4) |
| C(17)-C(18)-C(19)  | 140.2(4) | C(31)-C(32)-H(32A)  | 108.2    |
| C(20)-C(19)-C(28)  | 117.8(4) | C(33)-C(32)-H(32A)  | 108.2    |
| C(20)-C(19)-C(18)  | 137.4(4) | C(31)-C(32)-H(32B)  | 108.2    |
| C(28)-C(19)-C(18)  | 104.7(4) | C(33)-C(32)-H(32B)  | 108.2    |
| C(19)-C(20)-C(21)  | 119.0(4) | H(32A)-C(32)-H(32B) | 107.3    |
| C(19)-C(20)-H(20A) | 120.5    | C(32)-C(33)-C(34)   | 115.8(5) |
| C(21)-C(20)-H(20A) | 120.5    | C(32)-C(33)-H(33A)  | 108.3    |
| C(22)-C(21)-C(20)  | 122.6(5) | C(34)-C(33)-H(33A)  | 108.3    |
| C(22)-C(21)-H(21A) | 118.7    | C(32)-C(33)-H(33B)  | 108.3    |
| C(20)-C(21)-H(21A) | 118.7    | C(34)-C(33)-H(33B)  | 108.3    |
| C(21)-C(22)-C(23)  | 120.6(5) | H(33A)-C(33)-H(33B) | 107.4    |
| C(21)-C(22)-H(22A) | 119.7    | C(35)-C(34)-C(33)   | 120.7(5) |
| C(23)-C(22)-H(22A) | 119.7    | C(35)-C(34)-H(34A)  | 107.2    |
| C(28)-C(23)-C(22)  | 115.8(5) | C(33)-C(34)-H(34A)  | 107.2    |
| C(28)-C(23)-C(24)  | 116.1(5) | C(35)-C(34)-H(34B)  | 107.2    |
| C(22)-C(23)-C(24)  | 128.1(5) | C(33)-C(34)-H(34B)  | 107.2    |
| C(25)-C(24)-C(23)  | 120.4(5) | H(34A)-C(34)-H(34B) | 106.8    |
| C(25)-C(24)-H(24A) | 119.8    | C(34)-C(35)-C(36)   | 120.2(6) |
| C(23)-C(24)-H(24A) | 119.8    | C(34)-C(35)-H(35A)  | 107.3    |
| C(24)-C(25)-C(26)  | 123.0(5) | C(36)-C(35)-H(35A)  | 107.3    |
| C(24)-C(25)-H(25A) | 118.5    | C(34)-C(35)-H(35B)  | 107.3    |
| C(26)-C(25)-H(25A) | 118.5    | C(36)-C(35)-H(35B)  | 107.3    |
| C(27)-C(26)-C(25)  | 117.9(5) | H(35A)-C(35)-H(35B) | 106.9    |
| C(27)-C(26)-H(26A) | 121.0    | C(37)-C(36)-C(35)   | 124.3(7) |
| C(25)-C(26)-H(26A) | 121.0    | C(37)-C(36)-H(36A)  | 106.3    |
| C(26)-C(27)-C(28)  | 119.0(5) | C(35)-C(36)-H(36A)  | 106.3    |
| C(26)-C(27)-C(29)  | 136.9(5) | C(37)-C(36)-H(36B)  | 106.3    |
| C(28)-C(27)-C(29)  | 104.0(4) | C(35)-C(36)-H(36B)  | 106.3    |
| C(23)-C(28)-C(27)  | 123.6(5) | H(36A)-C(36)-H(36B) | 106.4    |
| C(23)-C(28)-C(19)  | 124.2(5) | C(38)-C(37)-C(36)   | 125.6(8) |
| C(27)-C(28)-C(19)  | 112.1(4) | C(38)-C(37)-H(37A)  | 105.9    |
| C(18)-C(29)-C(27)  | 111.7(4) | C(36)-C(37)-H(37A)  | 105.9    |
| C(18)-C(29)-S(2)   | 114.9(3) | C(38)-C(37)-H(37B)  | 105.9    |
| C(27)-C(29)-S(2)   | 133.4(4) | C(36)-C(37)-H(37B)  | 105.9    |
| C(1)-C(30)-C(17)   | 122.2(4) | H(37A)-C(37)-H(37B) | 106.2    |

|                     |          |                     |          |
|---------------------|----------|---------------------|----------|
| C(37)-C(38)-H(38A)  | 109.5    | C(46)-C(45)-H(45A)  | 106.1    |
| C(37)-C(38)-H(38B)  | 109.5    | C(44)-C(45)-H(45B)  | 106.1    |
| H(38A)-C(38)-H(38B) | 109.5    | C(46)-C(45)-H(45B)  | 106.1    |
| C(37)-C(38)-H(38C)  | 109.5    | H(45A)-C(45)-H(45B) | 106.3    |
| H(38A)-C(38)-H(38C) | 109.5    | C(45)-C(46)-H(46A)  | 109.5    |
| H(38B)-C(38)-H(38C) | 109.5    | C(45)-C(46)-H(46B)  | 109.5    |
| O(2)-C(39)-C(40)    | 111.4(5) | H(46A)-C(46)-H(46B) | 109.5    |
| O(2)-C(39)-H(39A)   | 109.3    | C(45)-C(46)-H(46C)  | 109.5    |
| C(40)-C(39)-H(39A)  | 109.3    | H(46A)-C(46)-H(46C) | 109.5    |
| O(2)-C(39)-H(39B)   | 109.3    | H(46B)-C(46)-H(46C) | 109.5    |
| C(40)-C(39)-H(39B)  | 109.3    | C(76)-C(47)-O(3)    | 118.6(3) |
| H(39A)-C(39)-H(39B) | 108.0    | C(76)-C(47)-C(48)   | 119.0(4) |
| C(41)-C(40)-C(39)   | 120.7(7) | O(3)-C(47)-C(48)    | 122.4(4) |
| C(41)-C(40)-H(40A)  | 107.1    | C(47)-C(48)-C(61)   | 117.8(4) |
| C(39)-C(40)-H(40A)  | 107.1    | C(47)-C(48)-C(49)   | 131.8(4) |
| C(41)-C(40)-H(40B)  | 107.1    | C(61)-C(48)-C(49)   | 110.4(3) |
| C(39)-C(40)-H(40B)  | 107.1    | C(60)-C(49)-C(48)   | 112.7(4) |
| H(40A)-C(40)-H(40B) | 106.8    | C(60)-C(49)-C(50)   | 108.6(3) |
| C(40)-C(41)-C(42)   | 121.0(7) | C(48)-C(49)-C(50)   | 138.7(4) |
| C(40)-C(41)-H(41A)  | 107.1    | C(51)-C(50)-C(59)   | 117.5(4) |
| C(42)-C(41)-H(41A)  | 107.1    | C(51)-C(50)-C(49)   | 137.9(4) |
| C(40)-C(41)-H(41B)  | 107.1    | C(59)-C(50)-C(49)   | 104.6(4) |
| C(42)-C(41)-H(41B)  | 107.1    | C(50)-C(51)-C(52)   | 119.1(4) |
| H(41A)-C(41)-H(41B) | 106.8    | C(50)-C(51)-H(51A)  | 120.5    |
| C(43)-C(42)-C(41)   | 127.6(8) | C(52)-C(51)-H(51A)  | 120.5    |
| C(43)-C(42)-H(42A)  | 105.4    | C(53)-C(52)-C(51)   | 122.7(5) |
| C(41)-C(42)-H(42A)  | 105.4    | C(53)-C(52)-H(52A)  | 118.6    |
| C(43)-C(42)-H(42B)  | 105.4    | C(51)-C(52)-H(52A)  | 118.6    |
| C(41)-C(42)-H(42B)  | 105.4    | C(52)-C(53)-C(54)   | 119.9(5) |
| H(42A)-C(42)-H(42B) | 106.0    | C(52)-C(53)-H(53A)  | 120.0    |
| C(42)-C(43)-C(44)   | 124.3(8) | C(54)-C(53)-H(53A)  | 120.0    |
| C(42)-C(43)-H(43A)  | 106.3    | C(59)-C(54)-C(53)   | 116.3(4) |
| C(44)-C(43)-H(43A)  | 106.3    | C(59)-C(54)-C(55)   | 116.0(5) |
| C(42)-C(43)-H(43B)  | 106.3    | C(53)-C(54)-C(55)   | 127.6(5) |
| C(44)-C(43)-H(43B)  | 106.3    | C(56)-C(55)-C(54)   | 120.5(5) |
| H(43A)-C(43)-H(43B) | 106.4    | C(56)-C(55)-H(55A)  | 119.8    |
| C(45)-C(44)-C(43)   | 128.8(9) | C(54)-C(55)-H(55A)  | 119.8    |
| C(45)-C(44)-H(44A)  | 105.1    | C(55)-C(56)-C(57)   | 122.6(4) |
| C(43)-C(44)-H(44A)  | 105.1    | C(55)-C(56)-H(56A)  | 118.7    |
| C(45)-C(44)-H(44B)  | 105.1    | C(57)-C(56)-H(56A)  | 118.7    |
| C(43)-C(44)-H(44B)  | 105.1    | C(58)-C(57)-C(56)   | 118.4(5) |
| H(44A)-C(44)-H(44B) | 105.9    | C(58)-C(57)-H(57A)  | 120.8    |
| C(44)-C(45)-C(46)   | 124.9(9) | C(56)-C(57)-H(57A)  | 120.8    |
| C(44)-C(45)-H(45A)  | 106.1    | C(57)-C(58)-C(59)   | 118.8(4) |

|                    |          |                     |          |
|--------------------|----------|---------------------|----------|
| C(57)-C(58)-C(60)  | 137.0(4) | C(72)-C(73)-C(74)   | 118.2(4) |
| C(59)-C(58)-C(60)  | 104.2(4) | C(72)-C(73)-C(75)   | 137.8(4) |
| C(54)-C(59)-C(58)  | 123.8(4) | C(74)-C(73)-C(75)   | 104.0(4) |
| C(54)-C(59)-C(50)  | 124.4(4) | C(69)-C(74)-C(73)   | 123.9(4) |
| C(58)-C(59)-C(50)  | 111.8(4) | C(69)-C(74)-C(65)   | 123.8(4) |
| C(49)-C(60)-C(58)  | 110.8(4) | C(73)-C(74)-C(65)   | 112.3(4) |
| C(49)-C(60)-S(3)   | 114.3(3) | C(64)-C(75)-C(73)   | 111.0(4) |
| C(58)-C(60)-S(3)   | 134.9(3) | C(64)-C(75)-S(4)    | 114.9(3) |
| C(62)-C(61)-C(48)  | 123.5(4) | C(73)-C(75)-S(4)    | 134.1(3) |
| C(62)-C(61)-S(3)   | 124.0(3) | C(47)-C(76)-C(63)   | 123.5(4) |
| C(48)-C(61)-S(3)   | 112.4(3) | C(47)-C(76)-S(4)    | 124.2(3) |
| O(4)-C(62)-C(61)   | 119.8(4) | C(63)-C(76)-S(4)    | 112.2(3) |
| O(4)-C(62)-C(63)   | 121.7(4) | O(3)-C(77)-C(78)    | 108.9(3) |
| C(61)-C(62)-C(63)  | 118.5(4) | O(3)-C(77)-H(77A)   | 109.9    |
| C(62)-C(63)-C(76)  | 117.5(4) | C(78)-C(77)-H(77A)  | 109.9    |
| C(62)-C(63)-C(64)  | 132.4(4) | O(3)-C(77)-H(77B)   | 109.9    |
| C(76)-C(63)-C(64)  | 110.1(3) | C(78)-C(77)-H(77B)  | 109.9    |
| C(75)-C(64)-C(63)  | 112.6(4) | H(77A)-C(77)-H(77B) | 108.3    |
| C(75)-C(64)-C(65)  | 108.6(4) | C(77)-C(78)-C(79)   | 115.1(4) |
| C(63)-C(64)-C(65)  | 138.8(4) | C(77)-C(78)-H(78A)  | 108.5    |
| C(66)-C(65)-C(74)  | 117.5(4) | C(79)-C(78)-H(78A)  | 108.5    |
| C(66)-C(65)-C(64)  | 138.4(4) | C(77)-C(78)-H(78B)  | 108.5    |
| C(74)-C(65)-C(64)  | 104.1(4) | C(79)-C(78)-H(78B)  | 108.5    |
| C(65)-C(66)-C(67)  | 119.6(4) | H(78A)-C(78)-H(78B) | 107.5    |
| C(65)-C(66)-H(66A) | 120.2    | C(78)-C(79)-C(80)   | 112.4(4) |
| C(67)-C(66)-H(66A) | 120.2    | C(78)-C(79)-H(79A)  | 109.1    |
| C(68)-C(67)-C(66)  | 121.8(5) | C(80)-C(79)-H(79A)  | 109.1    |
| C(68)-C(67)-H(67A) | 119.1    | C(78)-C(79)-H(79B)  | 109.1    |
| C(66)-C(67)-H(67A) | 119.1    | C(80)-C(79)-H(79B)  | 109.1    |
| C(67)-C(68)-C(69)  | 121.3(5) | H(79A)-C(79)-H(79B) | 107.9    |
| C(67)-C(68)-H(68A) | 119.3    | C(81)-C(80)-C(79)   | 115.1(4) |
| C(69)-C(68)-H(68A) | 119.3    | C(81)-C(80)-H(80A)  | 108.5    |
| C(74)-C(69)-C(68)  | 115.9(4) | C(79)-C(80)-H(80A)  | 108.5    |
| C(74)-C(69)-C(70)  | 115.3(5) | C(81)-C(80)-H(80B)  | 108.5    |
| C(68)-C(69)-C(70)  | 128.8(5) | C(79)-C(80)-H(80B)  | 108.5    |
| C(71)-C(70)-C(69)  | 121.3(5) | H(80A)-C(80)-H(80B) | 107.5    |
| C(71)-C(70)-H(70A) | 119.3    | C(82)-C(81)-C(80)   | 114.8(4) |
| C(69)-C(70)-H(70A) | 119.3    | C(82)-C(81)-H(81A)  | 108.6    |
| C(70)-C(71)-C(72)  | 122.3(5) | C(80)-C(81)-H(81A)  | 108.6    |
| C(70)-C(71)-H(71A) | 118.9    | C(82)-C(81)-H(81B)  | 108.6    |
| C(72)-C(71)-H(71A) | 118.9    | C(80)-C(81)-H(81B)  | 108.6    |
| C(73)-C(72)-C(71)  | 118.9(5) | H(81A)-C(81)-H(81B) | 107.6    |
| C(73)-C(72)-H(72A) | 120.5    | C(81)-C(82)-C(83)   | 115.1(5) |
| C(71)-C(72)-H(72A) | 120.5    | C(81)-C(82)-H(82A)  | 108.5    |

|                     |          |                     |          |
|---------------------|----------|---------------------|----------|
| C(83)-C(82)-H(82A)  | 108.5    | H(87A)-C(87)-H(87B) | 107.5    |
| C(81)-C(82)-H(82B)  | 108.5    | C(89)-C(88)-C(87)   | 114.1(7) |
| C(83)-C(82)-H(82B)  | 108.5    | C(89)-C(88)-H(88A)  | 108.7    |
| H(82A)-C(82)-H(82B) | 107.5    | C(87)-C(88)-H(88A)  | 108.7    |
| C(84)-C(83)-C(82)   | 115.1(6) | C(89)-C(88)-H(88B)  | 108.7    |
| C(84)-C(83)-H(83A)  | 108.5    | C(87)-C(88)-H(88B)  | 108.7    |
| C(82)-C(83)-H(83A)  | 108.5    | H(88A)-C(88)-H(88B) | 107.6    |
| C(84)-C(83)-H(83B)  | 108.5    | C(88)-C(89)-C(90)   | 111.2(9) |
| C(82)-C(83)-H(83B)  | 108.5    | C(88)-C(89)-H(89A)  | 109.4    |
| H(83A)-C(83)-H(83B) | 107.5    | C(90)-C(89)-H(89A)  | 109.4    |
| C(83)-C(84)-H(84A)  | 109.5    | C(88)-C(89)-H(89B)  | 109.4    |
| C(83)-C(84)-H(84B)  | 109.5    | C(90)-C(89)-H(89B)  | 109.4    |
| H(84A)-C(84)-H(84B) | 109.5    | H(89A)-C(89)-H(89B) | 108.0    |
| C(83)-C(84)-H(84C)  | 109.5    | C(91)-C(90)-C(89)   | 92.5(15) |
| H(84A)-C(84)-H(84C) | 109.5    | C(91)-C(90)-H(90A)  | 113.2    |
| H(84B)-C(84)-H(84C) | 109.5    | C(89)-C(90)-H(90A)  | 113.2    |
| O(4)-C(85)-C(86)    | 108.4(4) | C(91)-C(90)-H(90B)  | 113.2    |
| O(4)-C(85)-H(85A)   | 110.0    | C(89)-C(90)-H(90B)  | 113.2    |
| C(86)-C(85)-H(85A)  | 110.0    | H(90A)-C(90)-H(90B) | 110.6    |
| O(4)-C(85)-H(85B)   | 110.0    | C(90)-C(91)-C(92)   | 88.9(16) |
| C(86)-C(85)-H(85B)  | 110.0    | C(90)-C(91)-H(91A)  | 113.9    |
| H(85A)-C(85)-H(85B) | 108.4    | C(92)-C(91)-H(91A)  | 113.8    |
| C(85)-C(86)-C(87)   | 114.2(5) | C(90)-C(91)-H(91B)  | 113.8    |
| C(85)-C(86)-H(86A)  | 108.7    | C(92)-C(91)-H(91B)  | 113.8    |
| C(87)-C(86)-H(86A)  | 108.7    | H(91A)-C(91)-H(91B) | 111.0    |
| C(85)-C(86)-H(86B)  | 108.7    | C(91)-C(92)-H(92A)  | 109.5    |
| C(87)-C(86)-H(86B)  | 108.7    | C(91)-C(92)-H(92B)  | 109.5    |
| H(86A)-C(86)-H(86B) | 107.6    | H(92A)-C(92)-H(92B) | 109.5    |
| C(88)-C(87)-C(86)   | 115.4(6) | C(91)-C(92)-H(92C)  | 109.5    |
| C(88)-C(87)-H(87A)  | 108.4    | H(92A)-C(92)-H(92C) | 109.5    |
| C(86)-C(87)-H(87A)  | 108.4    | H(92B)-C(92)-H(92C) | 109.5    |
| C(88)-C(87)-H(87B)  | 108.4    |                     |          |
| C(86)-C(87)-H(87B)  | 108.4    |                     |          |

---

Symmetry transformations used to generate equivalent atoms:

**Table S5.** Crystal data and structure refinement for **M6**.

---

|                                   |                                                                                                           |
|-----------------------------------|-----------------------------------------------------------------------------------------------------------|
| Identification code               | <b>M6</b>                                                                                                 |
| Empirical formula                 | C <sub>62</sub> H <sub>54</sub> S <sub>2</sub>                                                            |
| Formula weight                    | 863.17                                                                                                    |
| Temperature                       | 296(2) K                                                                                                  |
| Wavelength                        | 0.71073 Å                                                                                                 |
| Crystal system, space group       | Monoclinic, C 2/c                                                                                         |
| Unit cell dimensions              | a = 41.379(8) Å    alpha = 90°<br>b = 6.0824(12) Å    beta = 106.27(3)°<br>c = 20.059(4) Å    gamma = 90° |
| Volume                            | 4846.4(17) Å <sup>3</sup>                                                                                 |
| Z, Calculated density             | 4, 1.183 Mg/m <sup>3</sup>                                                                                |
| Absorption coefficient            | 0.149 mm <sup>-1</sup>                                                                                    |
| F(000)                            | 1832                                                                                                      |
| Crystal size                      | 0.38 × 0.18 × 0.16 mm                                                                                     |
| Theta range for data collection   | 3.08 to 27.49°                                                                                            |
| Limiting indices                  | -53 ≤ h ≤ 53, -7 ≤ k ≤ 7, -25 ≤ l ≤ 26                                                                    |
| Reflections collected / unique    | 16037 / 5539 [R(int) = 0.0271]                                                                            |
| Completeness to theta = 27.49     | 99.8 %                                                                                                    |
| Absorption correction             | Semi-empirical from equivalents                                                                           |
| Max. and min. transmission        | 0.7456 and 0.6720                                                                                         |
| Refinement method                 | Full-matrix least-squares on F <sup>2</sup>                                                               |
| Data / restraints / parameters    | 5539 / 105 / 317                                                                                          |
| Goodness-of-fit on F <sup>2</sup> | 1.033                                                                                                     |
| Final R indices [I > 2σ(I)]       | R <sub>1</sub> = 0.0492, wR <sub>2</sub> = 0.1345                                                         |
| R indices (all data)              | R <sub>1</sub> = 0.0673, wR <sub>2</sub> = 0.1505                                                         |
| Largest diff. peak and hole       | 0.468 and -0.279 e Å <sup>-3</sup>                                                                        |

---

**Table S6.** Atomic coordinates ( $\times 10^4$ ) and equivalent isotropic displacement parameters ( $\text{Å}^2 \times 10^3$ ) for **M6**.

|        | x       | y         | z        | U(eq)  |
|--------|---------|-----------|----------|--------|
| S(1)   | 1799(1) | 3794(1)   | 153(1)   | 41(1)  |
| C(1)   | 2221(1) | 1126(3)   | -339(1)  | 34(1)  |
| C(2)   | 2546(1) | 599(3)    | -387(1)  | 34(1)  |
| C(3)   | 2666(1) | -1132(3)  | -736(1)  | 36(1)  |
| C(4)   | 2545(1) | -3111(3)  | -1162(1) | 38(1)  |
| C(5)   | 2247(1) | -4228(3)  | -1410(1) | 44(1)  |
| C(6)   | 2242(1) | -6169(3)  | -1807(1) | 51(1)  |
| C(7)   | 2522(1) | -6979(4)  | -1955(1) | 53(1)  |
| C(8)   | 2833(1) | -5868(3)  | -1714(1) | 49(1)  |
| C(9)   | 2833(1) | -3982(3)  | -1323(1) | 42(1)  |
| C(10)  | 3146(1) | -6440(4)  | -1828(1) | 62(1)  |
| C(11)  | 3424(1) | -5185(4)  | -1563(1) | 67(1)  |
| C(12)  | 2186(1) | 2976(3)   | 44(1)    | 35(1)  |
| C(13)  | 1992(1) | 5955(3)   | 659(1)   | 40(1)  |
| C(14)  | 1877(1) | 7709(3)   | 1032(1)  | 44(1)  |
| C(15)  | 1579(1) | 8291(4)   | 1157(1)  | 57(1)  |
| C(16)  | 1923(1) | -96(3)    | -657(1)  | 39(1)  |
| C(17)  | 1650(1) | -869(3)   | -874(1)  | 45(1)  |
| C(18)  | 1315(1) | -1759(3)  | -1106(1) | 44(1)  |
| C(19)  | 1084(1) | -1190(3)  | -745(1)  | 48(1)  |
| C(20)  | 757(1)  | -1952(4)  | -953(1)  | 49(1)  |
| C(21)  | 668(1)  | -3325(4)  | -1533(1) | 50(1)  |
| C(22)  | 891(1)  | -3941(3)  | -1905(1) | 46(1)  |
| C(23)  | 1218(1) | -3130(3)  | -1680(1) | 46(1)  |
| C(24)  | 495(1)  | -1322(4)  | -576(1)  | 62(1)  |
| C(25)  | 353(1)  | -3318(6)  | -332(2)  | 134(2) |
| C(26)  | 642(1)  | 170(8)    | 48(2)    | 132(2) |
| C(27)  | 210(1)  | -54(7)    | -1071(2) | 121(1) |
| C(28)  | 784(1)  | -5408(4)  | -2552(1) | 58(1)  |
| C(29)  | 413(1)  | -6040(14) | -2738(3) | 94(3)  |
| C(30)  | 841(2)  | -4193(14) | -3166(3) | 106(3) |
| C(31)  | 989(2)  | -7482(11) | -2407(4) | 104(3) |
| C(29A) | 599(3)  | -7454(16) | -2405(6) | 107(4) |
| C(30A) | 550(4)  | -4050(19) | -3111(5) | 153(7) |
| C(31A) | 1073(2) | -6280(30) | -2790(7) | 135(6) |
| H(5A)  | 2051    | -3721     | -1320    | 53     |
| H(6A)  | 2039    | -6921     | -1972    | 61     |
| H(7A)  | 2508    | -8261     | -2214    | 63     |

|        |      |       |       |     |
|--------|------|-------|-------|-----|
| H(10A) | 3161 | -7685 | -2087 | 75  |
| H(11A) | 3625 | -5591 | -1652 | 80  |
| H(15A) | 1385 | 7463  | 979   | 68  |
| H(19A) | 1152 | -283  | -357  | 58  |
| H(21A) | 448  | -3853 | -1678 | 60  |
| H(23A) | 1373 | -3511 | -1918 | 56  |
| H(25A) | 190  | -2886 | -98   | 201 |
| H(25B) | 531  | -4124 | -16   | 201 |
| H(25C) | 247  | -4229 | -722  | 201 |
| H(26A) | 471  | 515   | 270   | 198 |
| H(26B) | 723  | 1503  | -106  | 198 |
| H(26C) | 825  | -570  | 371   | 198 |
| H(27A) | 45   | 332   | -838  | 181 |
| H(27B) | 108  | -952  | -1467 | 181 |
| H(27C) | 298  | 1260  | -1220 | 181 |
| H(29A) | 279  | -4861 | -2991 | 141 |
| H(29B) | 349  | -6314 | -2320 | 141 |
| H(29C) | 376  | -7343 | -3019 | 141 |
| H(30A) | 972  | -2893 | -3007 | 159 |
| H(30B) | 628  | -3788 | -3479 | 159 |
| H(30C) | 960  | -5127 | -3403 | 159 |
| H(31A) | 1213 | -7185 | -2430 | 156 |
| H(31B) | 887  | -8575 | -2746 | 156 |
| H(31C) | 997  | -8012 | -1952 | 156 |
| H(29D) | 408  | -7014 | -2256 | 160 |
| H(29E) | 749  | -8313 | -2048 | 160 |
| H(29F) | 525  | -8318 | -2821 | 160 |
| H(30D) | 665  | -2753 | -3195 | 229 |
| H(30E) | 356  | -3634 | -2964 | 229 |
| H(30F) | 478  | -4898 | -3531 | 229 |
| H(31D) | 1200 | -5067 | -2893 | 202 |
| H(31E) | 988  | -7154 | -3199 | 202 |
| H(31F) | 1215 | -7160 | -2429 | 202 |

---

**Table S7.** Bond lengths [Å] and angles [deg] for **M6**.

|                  |            |                 |            |
|------------------|------------|-----------------|------------|
| S(1)-C(13)       | 1.7147(19) | C(21)-H(21A)    | 0.9300     |
| S(1)-C(12)       | 1.7455(17) | C(22)-C(23)     | 1.392(2)   |
| C(1)-C(12)       | 1.393(2)   | C(22)-C(28)     | 1.534(3)   |
| C(1)-C(2)        | 1.409(2)   | C(23)-H(23A)    | 0.9300     |
| C(1)-C(16)       | 1.429(2)   | C(24)-C(25)     | 1.490(4)   |
| C(2)-C(12)#1     | 1.426(2)   | C(24)-C(27)     | 1.521(4)   |
| C(2)-C(3)        | 1.429(2)   | C(24)-C(26)     | 1.528(4)   |
| C(3)-C(13)#1     | 1.383(2)   | C(25)-H(25A)    | 0.9600     |
| C(3)-C(4)        | 1.481(2)   | C(25)-H(25B)    | 0.9600     |
| C(4)-C(5)        | 1.372(3)   | C(25)-H(25C)    | 0.9600     |
| C(4)-C(9)        | 1.421(2)   | C(26)-H(26A)    | 0.9600     |
| C(5)-C(6)        | 1.421(3)   | C(26)-H(26B)    | 0.9600     |
| C(5)-H(5A)       | 0.9300     | C(26)-H(26C)    | 0.9600     |
| C(6)-C(7)        | 1.367(3)   | C(27)-H(27A)    | 0.9600     |
| C(6)-H(6A)       | 0.9300     | C(27)-H(27B)    | 0.9600     |
| C(7)-C(8)        | 1.412(3)   | C(27)-H(27C)    | 0.9600     |
| C(7)-H(7A)       | 0.9300     | C(28)-C(31A)    | 1.501(8)   |
| C(8)-C(9)        | 1.390(3)   | C(28)-C(31)     | 1.502(6)   |
| C(8)-C(10)       | 1.422(3)   | C(28)-C(30A)    | 1.508(8)   |
| C(9)-C(14)#1     | 1.411(3)   | C(28)-C(30)     | 1.512(6)   |
| C(10)-C(11)      | 1.360(4)   | C(28)-C(29)     | 1.526(5)   |
| C(10)-H(10A)     | 0.9300     | C(28)-C(29A)    | 1.532(8)   |
| C(11)-C(15)#1    | 1.413(3)   | C(29)-H(29A)    | 0.9600     |
| C(11)-H(11A)     | 0.9300     | C(29)-H(29B)    | 0.9600     |
| C(12)-C(2)#1     | 1.426(2)   | C(29)-H(29C)    | 0.9600     |
| C(13)-C(3)#1     | 1.383(2)   | C(30)-H(30A)    | 0.9600     |
| C(13)-C(14)      | 1.457(3)   | C(30)-H(30B)    | 0.9600     |
| C(14)-C(15)      | 1.372(3)   | C(30)-H(30C)    | 0.9600     |
| C(14)-C(9)#1     | 1.411(3)   | C(31)-H(31A)    | 0.9600     |
| C(15)-C(11)#1    | 1.413(3)   | C(31)-H(31B)    | 0.9600     |
| C(15)-H(15A)     | 0.9300     | C(31)-H(31C)    | 0.9600     |
| C(16)-C(17)      | 1.189(2)   | C(29A)-H(29D)   | 0.9600     |
| C(17)-C(18)      | 1.437(2)   | C(29A)-H(29E)   | 0.9600     |
| C(18)-C(23)      | 1.388(3)   | C(29A)-H(29F)   | 0.9600     |
| C(18)-C(19)      | 1.393(3)   | C(30A)-H(30D)   | 0.9600     |
| C(19)-C(20)      | 1.381(3)   | C(30A)-H(30E)   | 0.9600     |
| C(19)-H(19A)     | 0.9300     | C(30A)-H(30F)   | 0.9600     |
| C(20)-C(21)      | 1.395(3)   | C(31A)-H(31D)   | 0.9600     |
| C(20)-C(24)      | 1.535(3)   | C(31A)-H(31E)   | 0.9600     |
| C(21)-C(22)      | 1.391(3)   | C(31A)-H(31F)   | 0.9600     |
| C(13)-S(1)-C(12) | 90.12(8)   | C(12)-C(1)-C(2) | 118.08(14) |



|                      |            |                     |            |
|----------------------|------------|---------------------|------------|
| C(12)-C(1)-C(16)     | 117.10(15) | C(17)-C(16)-C(1)    | 169.50(19) |
| C(2)-C(1)-C(16)      | 124.82(16) | C(16)-C(17)-C(18)   | 177.0(2)   |
| C(1)-C(2)-C(12)#1    | 117.24(15) | C(23)-C(18)-C(19)   | 119.99(16) |
| C(1)-C(2)-C(3)       | 132.15(15) | C(23)-C(18)-C(17)   | 121.55(17) |
| C(12)#1-C(2)-C(3)    | 110.60(14) | C(19)-C(18)-C(17)   | 118.46(17) |
| C(13)#1-C(3)-C(2)    | 111.99(16) | C(20)-C(19)-C(18)   | 121.04(19) |
| C(13)#1-C(3)-C(4)    | 107.41(15) | C(20)-C(19)-H(19A)  | 119.5      |
| C(2)-C(3)-C(4)       | 140.60(15) | C(18)-C(19)-H(19A)  | 119.5      |
| C(5)-C(4)-C(9)       | 117.26(17) | C(19)-C(20)-C(21)   | 117.51(18) |
| C(5)-C(4)-C(3)       | 137.49(17) | C(19)-C(20)-C(24)   | 122.41(19) |
| C(9)-C(4)-C(3)       | 105.24(15) | C(21)-C(20)-C(24)   | 120.08(17) |
| C(4)-C(5)-C(6)       | 119.03(19) | C(22)-C(21)-C(20)   | 123.18(17) |
| C(4)-C(5)-H(5A)      | 120.5      | C(22)-C(21)-H(21A)  | 118.4      |
| C(6)-C(5)-H(5A)      | 120.5      | C(20)-C(21)-H(21A)  | 118.4      |
| C(7)-C(6)-C(5)       | 122.75(19) | C(21)-C(22)-C(23)   | 117.57(18) |
| C(7)-C(6)-H(6A)      | 118.6      | C(21)-C(22)-C(28)   | 122.23(17) |
| C(5)-C(6)-H(6A)      | 118.6      | C(23)-C(22)-C(28)   | 120.19(18) |
| C(6)-C(7)-C(8)       | 119.94(19) | C(18)-C(23)-C(22)   | 120.71(18) |
| C(6)-C(7)-H(7A)      | 120.0      | C(18)-C(23)-H(23A)  | 119.6      |
| C(8)-C(7)-H(7A)      | 120.0      | C(22)-C(23)-H(23A)  | 119.6      |
| C(9)-C(8)-C(7)       | 116.35(19) | C(25)-C(24)-C(27)   | 108.9(3)   |
| C(9)-C(8)-C(10)      | 116.0(2)   | C(25)-C(24)-C(26)   | 108.5(3)   |
| C(7)-C(8)-C(10)      | 127.7(2)   | C(27)-C(24)-C(26)   | 107.0(3)   |
| C(8)-C(9)-C(14)#1    | 123.44(18) | C(25)-C(24)-C(20)   | 110.9(2)   |
| C(8)-C(9)-C(4)       | 124.66(18) | C(27)-C(24)-C(20)   | 109.3(2)   |
| C(14)#1-C(9)-C(4)    | 111.90(16) | C(26)-C(24)-C(20)   | 112.15(19) |
| C(11)-C(10)-C(8)     | 120.7(2)   | C(24)-C(25)-H(25A)  | 109.5      |
| C(11)-C(10)-H(10A)   | 119.7      | C(24)-C(25)-H(25B)  | 109.5      |
| C(8)-C(10)-H(10A)    | 119.7      | H(25A)-C(25)-H(25B) | 109.5      |
| C(10)-C(11)-C(15)#1  | 122.7(2)   | C(24)-C(25)-H(25C)  | 109.5      |
| C(10)-C(11)-H(11A)   | 118.7      | H(25A)-C(25)-H(25C) | 109.5      |
| C(15)#1-C(11)-H(11A) | 118.7      | H(25B)-C(25)-H(25C) | 109.5      |
| C(1)-C(12)-C(2)#1    | 124.68(15) | C(24)-C(26)-H(26A)  | 109.5      |
| C(1)-C(12)-S(1)      | 122.72(12) | C(24)-C(26)-H(26B)  | 109.5      |
| C(2)#1-C(12)-S(1)    | 112.61(13) | H(26A)-C(26)-H(26B) | 109.5      |
| C(3)#1-C(13)-C(14)   | 110.88(16) | C(24)-C(26)-H(26C)  | 109.5      |
| C(3)#1-C(13)-S(1)    | 114.65(14) | H(26A)-C(26)-H(26C) | 109.5      |
| C(14)-C(13)-S(1)     | 134.46(14) | H(26B)-C(26)-H(26C) | 109.5      |
| C(15)-C(14)-C(9)#1   | 119.23(18) | C(24)-C(27)-H(27A)  | 109.5      |
| C(15)-C(14)-C(13)    | 136.21(19) | C(24)-C(27)-H(27B)  | 109.5      |
| C(9)#1-C(14)-C(13)   | 104.55(15) | H(27A)-C(27)-H(27B) | 109.5      |
| C(14)-C(15)-C(11)#1  | 118.0(2)   | C(24)-C(27)-H(27C)  | 109.5      |
| C(14)-C(15)-H(15A)   | 121.0      | H(27A)-C(27)-H(27C) | 109.5      |
| C(11)#1-C(15)-H(15A) | 121.0      | H(27B)-C(27)-H(27C) | 109.5      |

|                      |          |                      |       |
|----------------------|----------|----------------------|-------|
| C(31A)-C(28)-C(31)   | 46.4(6)  | H(29E)-C(29A)-H(29F) | 109.5 |
| C(31A)-C(28)-C(30A)  | 111.1(7) | C(28)-C(30A)-H(30D)  | 109.5 |
| C(31)-C(28)-C(30A)   | 144.6(5) | C(28)-C(30A)-H(30E)  | 109.5 |
| C(31A)-C(28)-C(30)   | 65.9(6)  | H(30D)-C(30A)-H(30E) | 109.5 |
| C(31)-C(28)-C(30)    | 111.1(5) | C(28)-C(30A)-H(30F)  | 109.5 |
| C(30A)-C(28)-C(30)   | 48.7(6)  | H(30D)-C(30A)-H(30F) | 109.5 |
| C(31A)-C(28)-C(29)   | 132.1(4) | H(30E)-C(30A)-H(30F) | 109.5 |
| C(31)-C(28)-C(29)    | 108.1(4) | C(28)-C(31A)-H(31D)  | 109.5 |
| C(30A)-C(28)-C(29)   | 64.0(7)  | C(28)-C(31A)-H(31E)  | 109.5 |
| C(30)-C(28)-C(29)    | 107.5(4) | H(31D)-C(31A)-H(31E) | 109.5 |
| C(31A)-C(28)-C(29A)  | 105.1(7) | C(28)-C(31A)-H(31F)  | 109.5 |
| C(31)-C(28)-C(29A)   | 64.2(5)  | H(31D)-C(31A)-H(31F) | 109.5 |
| C(30A)-C(28)-C(29A)  | 109.6(8) | H(31E)-C(31A)-H(31F) | 109.5 |
| C(30)-C(28)-C(29A)   | 138.9(5) |                      |       |
| C(29)-C(28)-C(29A)   | 47.1(4)  |                      |       |
| C(31A)-C(28)-C(22)   | 114.1(4) |                      |       |
| C(31)-C(28)-C(22)    | 108.2(3) |                      |       |
| C(30A)-C(28)-C(22)   | 106.5(4) |                      |       |
| C(30)-C(28)-C(22)    | 109.4(3) |                      |       |
| C(29)-C(28)-C(22)    | 112.6(3) |                      |       |
| C(29A)-C(28)-C(22)   | 110.6(4) |                      |       |
| C(28)-C(29)-H(29A)   | 109.5    |                      |       |
| C(28)-C(29)-H(29B)   | 109.5    |                      |       |
| H(29A)-C(29)-H(29B)  | 109.5    |                      |       |
| C(28)-C(29)-H(29C)   | 109.5    |                      |       |
| H(29A)-C(29)-H(29C)  | 109.5    |                      |       |
| H(29B)-C(29)-H(29C)  | 109.5    |                      |       |
| C(28)-C(30)-H(30A)   | 109.5    |                      |       |
| C(28)-C(30)-H(30B)   | 109.5    |                      |       |
| H(30A)-C(30)-H(30B)  | 109.5    |                      |       |
| C(28)-C(30)-H(30C)   | 109.5    |                      |       |
| H(30A)-C(30)-H(30C)  | 109.5    |                      |       |
| H(30B)-C(30)-H(30C)  | 109.5    |                      |       |
| C(28)-C(31)-H(31A)   | 109.5    |                      |       |
| C(28)-C(31)-H(31B)   | 109.5    |                      |       |
| H(31A)-C(31)-H(31B)  | 109.5    |                      |       |
| C(28)-C(31)-H(31C)   | 109.5    |                      |       |
| H(31A)-C(31)-H(31C)  | 109.5    |                      |       |
| H(31B)-C(31)-H(31C)  | 109.5    |                      |       |
| C(28)-C(29A)-H(29D)  | 109.5    |                      |       |
| C(28)-C(29A)-H(29E)  | 109.5    |                      |       |
| H(29D)-C(29A)-H(29E) | 109.5    |                      |       |
| C(28)-C(29A)-H(29F)  | 109.5    |                      |       |
| H(29D)-C(29A)-H(29F) | 109.5    |                      |       |

---

Symmetry transformations used to generate equivalent atoms:

#1  $-x+1/2, -y+1/2, -z$
